# Supplementary material
Source: PubMed Central journal article supplement (PMC5755045)

## **Supplemental Data**

### **Supplemental Methods**

#### **Informed consent/IRB approval.**

Blood was obtained from normal volunteer donors who provided written informed consent in accordance with the Declaration of Helsinki to participate in research protocols approved by the Institutional Review Board of the Fred Hutchinson Cancer Research Center.

#### **Cell lines**

T2 cells, the THP-1 AML cell line, and the HSB-2 T-ALL line were purchased from the American Type Culture Collection (ATCC CRL-1992, ATCC TIB-202, ATCC CCL-120.1). The T-ALL line RPMI-8402, and the lymphoma cell lines SUP-M2 and SU-DHL-1 were purchased from the Deutsche Sammlung von Mikroorganismen und Zellkulturen DSMZ (ACC-290, ACC-509, ACC-356). The B-ALL cell lines BALL -1 and RS;411 were provided by S. Riddell, and J. Radich, respectively. The T-ALL line MOLT-4 and NB-4 AML cell line were provided by R. Walter and the T-ALL line CEM was provided by B. Clurman. EBV transformed lymphoblastoid cell lines (LCL) were generated by culturing PBMC in LCL medium (described below), EBV supernatant, and 160ng/mL Cyclosporin A (Sigma). HLA and HA-1 genotyping of all cell lines were confirmed as described below.

EBV LCL, HLA-A2<sup>+</sup> T2 cells, B-ALL, and T-ALL cell lines were cultured in RPMI 1640, 10% fetal calf serum (FCS) and 1% penicillin/streptomycin (LCL medium). AML cell lines were cultured in LCL medium with 20% FCS. Lenti-X 293T cells (Clontech) used in lentivirus production were maintained in DMEM (Invitrogen) supplemented with 10% FCS, 25mM HEPES, 2mM L-glutamine, 1% penicillin/streptomycin, and detached for passage using 0.05% Trypsin (Invitrogen). T cells were maintained in RPMI 1640, 10% human serum, 1% penicillin/streptomycin, 3mM L-glutamine, and 50μM β-mercaptoethanol (CTL medium).

B-ALL, T-ALL and AML cell lines were transduced with HLA-A\*0201 and/or HA-1 mini-gene LV constructs with a CD34 tag, where necessary as described below. Transduced cells were then sorted on HLA-A\*0201 and/or CD34 by fluorescence activated cell sorting FACS. Monocyte derived dendritic cells (DCs) were used as antigen presenting cells for generating HA-1-specific CD8<sup>+</sup> T cell lines. CD14<sup>+</sup> monocytes were isolated from PBMC using anti-CD14 mAb-conjugated magnetic beads (Miltenyi Biotec). Monocytes were cultured in AIMV medium (Invitrogen) with 800U/mL GM-CSF and 1000U/mL IL-4 for 48 hours, then matured by incubation with 10 ng/mL TNF- $\alpha$ , 2 ng/mL IL-1 $\beta$ , 1000U/mL IL-6, and 1000ng/mL prostaglandin E2 for an additional 48 hours before use.

### **Class I HLA Typing and HA-1 Genotyping**

Genomic DNA isolated from cell lines, donor PBMC or primary AML (QIAamp DNA Blood Kit: Qiagen) was used for HLA typing (Allset Gold Low-Resolution ABC Kit: One Lambda) and for genotyping the HA-1 polymorphism (RS\_1801284; A/A, A/G, G/G). The HA-1 genotype was determined by PCR amplification of the polymorphic region of HA-1 using primers RS\_1801284-1F 5'-**AGGACATCTCCCATCTGCTG** -3' and RS\_1801284-2R 5'-**TTGAGCCAGTGTCGCTCAG** -3' in a 50  $\mu$ L reaction mixture of 5 $\mu$ L of genomic DNA (25-50ng), 45 $\mu$ L of 1X Top Taq buffer (Qiagen), 0.25 $\mu$ L Top Taq polymerase (Qiagen), and 400nM forward and reverse primers. PCR products were purified (QIAquick PCR Purification Kit: Qiagen), sequenced and analyzed.

### **Chromium release assay**

Cytotoxicity was measured using <sup>51</sup>Cr-labeled target cells. Briefly, target cells were labelled with <sup>51</sup>Cr overnight (T2 cells pulsed with peptide, LCL, leukemia cell lines) or for 6 hours (primary leukemia) at 37°C and 5% CO<sub>2</sub>. After labeling of targets, effector cells were added to the target cells in a 20:1 effector to target (E:T) ratio, unless otherwise specified, and incubated for 4 hours.

After the co-incubation supernatant was harvested for  $\gamma$ -counting and specific lysis was calculated using standard formula.

### **Intracellular Cytokine Staining and CD107a degranulation assays**

For cytokine staining, targets and effector T cells were washed and plated at an E:T ratio of 1:2 with Fastimmune CD28/CD49d co-stimulatory antibodies (BD Biosciences). Co-cultures were incubated at 37°C. After 1.5 h, Golgi Plug transport inhibitor (BD Biosciences) was added to each well and co-cultures were incubated for an additional 4.5 h. The cells were then fixed, permeabilized, and stained with anti-IFN $\gamma$ , anti-IL-2, anti-CD4, anti-CD8 mAbs, and DAPI, and in some assays with anti-TNF $\alpha$ . For the degranulation assay, targets and effector T cells were washed and plated at a E:T ratio of 2:1 with Golgi Stop transport inhibitor (BD Biosciences) and anti-CD107a mAb for 6 h at 37°C. Cells were then washed and stained with HA-1/HLA-A2 multimer and anti-CD8 mAb and DAPI. Stimulators in each assay included a panel of HA-1<sup>+</sup> or HA-1<sup>-</sup> HLA-A\*0201<sup>+</sup> AML cells that were thawed, washed, suspended in LCL medium supplemented with 500U/mL IFN $\gamma$ , and incubated for 24 hours at 37°C. T2 cells pulsed with 1 $\mu$ g/mL HA-1 peptide, and unpulsed T2 cells were used as control stimulators. All stimulators were washed twice to remove any residual IFN $\gamma$  or peptide before co-culture initiation.

### **Lymphoproliferation assay**

Previously sorted and expanded HA-1 TCR-transduced CD8<sup>+</sup> or CD4<sup>+</sup> T cells were washed and incubated with CellTrace carboxyfluorescein (CFSE: Thermofisher) at 1 $\mu$ M for 15min at 37°C. CFSE-stained T cells were then washed and co-cultured with target cells at 2:1 E:T ratio. Target cells included B-LCLs, leukemia cell lines and primary leukemia, irradiated at 8000 cGy. After 3 days of incubation, cells were harvested and stained with HA-1/HLA-A2 multimer, anti-CD8 mAb

or anti-CD4, and DAPI. Flow cytometry was performed to determine the proliferation of HA-1 TCR T cells by assessing the decay of CFSE activity.

### **Safety switch analysis**

Previously sorted and expanded HA-1<sup>+</sup> T cells transduced with transgene constructs including 'safety switch' genes were incubated 1:1 with autologous untransduced T cells in the presence or absence of drugs intended to induce death of cells expressing the corresponding safety switch: AP1903 (0.05-500ng/ml) for iCasp9; cetuximab (0.05-500ug/ml) for tEGFR; rituximab (0.05-500ug/ml) for RQR8; anti-Myc mAb (0.0005-5ug/ml) for Myc. 15% rabbit complement was added to cells exposed to mAbs to evaluate complement dependent cytotoxicity (CDC). T cells transduced with the TCR2 without a safety switch were also incubated in the presence or absence of the safety switch activating drugs as experimental controls. After 24 hours, cells were stained with HA-1/HLA-A2 multimer-PE, anti-CD8 mAb, anti-CD4 mAb, AnnexinV, and DAPI. Elimination of transduced cells was then assessed by flow cytometry analysis enumerating % residual viable (Annexin<sup>-</sup>, DAPI<sup>-</sup>) HA-1<sup>+</sup> cells. Survival was calculated by the ratio of residual live HA-1 TCR<sup>+</sup> events in presence of the drug versus medium alone.

### **Flow cytometry and cell sorting**

All cell staining was performed using standard protocols and monoclonal antibodies described on Supplemental Table 2. Flow cytometric evaluations were performed on either an LSR-2 or Fortessa flow cytometer (BD Biosciences). Fluorescence activated cell sorting was performed using a FACS Aria II (BD Biosciences). Flow cytometry data analysis was performed using FlowJo software (TreeStar).

## **Supplemental Figure Legends**

### **Supplemental Figure 1. Isolation of high functional avidity HA-1-specific T cell clones.**

(A) HA-1/HLA-A2 multimer staining of CD8<sup>+</sup> T cell clones by flow cytometry. (B-C) CRA at ET ratio of 20:1 to evaluate lytic activity: (B) lysis of target cells pulsed with a range of HA-1 peptide concentrations by HA-1-specific T cell clones; (C) lysis of HA-1 peptide-pulsed T2 cells, HLA-A2/HA1<sup>+</sup> AML cell (THP1), HLA-A2<sup>+</sup>/HA1<sup>+</sup> primary AML and HLA-A2<sup>+</sup>/HA1<sup>-</sup> primary AML by HA-1-specific T cell clones.

### **Supplemental Figure 2. HLA-A2 expression on leukemia cell lines transduced with LV encoding HLA-A2.**

Relative expression of HLA-A2 on wild type A2<sup>-</sup> cell line BALL-1, HLA-A2 LV transduced B-ALL lines (1) BALL-1, (2) RS4;11, and T-ALL lines (1) MOLT4, (2) CEM (3) RPMI-8402, and WT HLA-A2<sup>+</sup> T-ALL cell line (4) HSB-2, and AML line THP-1 evaluated by flow cytometry.

### **Supplemental Figure 3. Evaluation of CD4<sup>+</sup> T cells transduced with the HA-1 TCR2 and CD8 co-receptor variants.**

(A) Mean fluorescence intensity (MFI) of HA-1/HLA-A2 multimer staining of CD4<sup>+</sup> T cells transduced with CD8  $\alpha$  and/or  $\beta$ M1-M5 chains. Constructs that included CD8  $\alpha$  and  $\beta$  chains, allowing dimer formation are shown in green, CD8  $\alpha$  only constructs are pink, CD8  $\beta$  only constructs and truncated  $\alpha$  and/or  $\beta$  are grey. MFI of the various CD8 co-receptor constructs is summarized in the graph. (B) CRA showing lysis of T2 pulsed with HA-1 peptide at various concentrations by CD8<sup>+</sup>T cells (blue, solid blue circles) and CD4<sup>+</sup> T cells transduced with the CD8  $\alpha$  and  $\beta$  chains (green), CD8  $\alpha$  chains alone (pink), or HA-1 TCR only (blue, open circle). (C) Proliferation assay showing dilution of the carboxyfluorescein (CFSE) dye with cell division in CD4<sup>+</sup> T cells transduced with (top to bottom) the HA-1 TCR alone, with CD8  $\alpha$  chain, CD8  $\alpha$  and  $\beta$ M1 chain, or CD8  $\alpha$  and  $\beta$ M4 chain, in response to stimulation with HLA-A2<sup>+</sup>HA-1<sup>+</sup> LCL (homozygous blue, heterozygous green), HA-1<sup>-</sup> LCL (red), or media only (orange).

**Supplemental Figure 4. Evaluation of CD8<sup>+</sup> HA-1 TCR T cells stimulated in the presence of HA-1 TCR CD4<sup>+</sup> T cells.**

(A) ICC flow cytometry showing production of IL-2, IFN- $\gamma$ , and TNF $\alpha$  by (gated) CD8<sup>+</sup> T cells in response to T2 target cells pulsed with 10ng/ml of HA-1 peptide when CD8<sup>+</sup> HA-1 TCR T cells were stimulated alone (blue) or in the presence of HA-1 TCR CD4<sup>+</sup> T cells (grey). (B) Expression of 'exhaustion' markers on (gated) CD8<sup>+</sup> HA-1 TCR T cells after 48 hours in culture (mock stimulation; green bars) or after 48 hours in culture with HLA-A2<sup>+</sup>/HA-1<sup>+</sup> AML cell line THP-1 when CD8<sup>+</sup> T cells were stimulated alone (blue) or in the presence of HA-1 TCR CD4<sup>+</sup> T cells (grey). (C) CFSE assay showing proliferation of transduced CD8<sup>+</sup> HA-1 TCR T cells in response to HLA-A2<sup>+</sup>/HA-1<sup>+</sup> primary AML (left and center panels), HLA-A2<sup>+</sup>/HA-1<sup>+</sup> LCL (right panels) or media only (green) when CD8<sup>+</sup> T cells were stimulated alone (blue) or co-cultured with transduced CD4<sup>+</sup> T cells (grey).

**Supplemental Figure 5. Susceptibility of safety switch genes to safety switch activating drugs.**

Survival of CD8<sup>+</sup> T cells transduced with HA-1 TCR2 plus safety genes after exposure to safety-switch activating drug at different concentrations. Survival of iCasp9-TCR2, tEGFR-TCR2, RQR8-TCR2 and Myc-TCR2 CD8<sup>+</sup> transduced T cells was measured after 24 hours of incubation with various concentrations of the respective safety switch activating drug: AP1903, anti-EGFR mAb (Cetuximab) + complement, anti-CD20Mab (Rituximab) + complement, anti-myc mAb + complement. Residual HA-1 TCR2 transduced T cells were quantified by flow cytometry. The arrows indicate the drug concentrations that can be achieved and tolerated in humans *in vivo*.

**Supplemental Figure 6. Evaluation of HA-1 TCR and CD34 epitope expression on transduced T cells over time.**

CD34 (upper panel) and HA-1 TCR (lower panel) expression on T cells after FACS-sorting (blue), expansion (gray) enrichment by CD34 immunomagnetic beads (green), and then after resting for 48 hours in CTL media with IL2 after the end of expansion and CD34 selection (orange) (n=2).

**Supplemental Figure 7. Evaluation of clinical-scale HA-1-TCR2-RQR-CD8 transduced T cells selection tag and safety switch efficacy.**

(A) CD34 (left graph) and HA-1 TCR (right graph) expression on T cells in the final product before (blue bars) and after (gray bars) enrichment by CD34 immunomagnetic beads (N=3) (B) Survival of T cells in the cell product after 24 hours of incubation with 5ng/ml AP1903 (blue) or media control only (grey).

**Supplemental Figure 8. Evaluation of native TCR beta repertoire.**

Endogenous TCR  $\beta$  repertoire across CD8<sup>+</sup> (left panels) and CD4<sup>+</sup> (right panels) T cells before the HA-1 TCR transduction and after the transduction, cell expansion and CD34 selection (n=2). (A) TCR immunosequencing showing the frequency distribution of the top 15 TCR  $\beta$  chains for each sample. TCR  $\beta$  (before and after expansion) are depicted by color concordance. (B) Table showing the number of unique nucleotide rearrangements in each sample (Richness), how uniformly distributed the repertoire is (Pielou Evenness), and how diverse the repertoire is (Shannon's entropy). Pielou Evenness values approaching 0 indicate a skewed distribution of frequencies and values approaching 1 indicate that every rearrangement is present at nearly identical frequency. Shannon's entropy (also known as Simpson's D) values approaching 0 corresponds to a polyclonal, infinitely large, perfectly even repertoire and D approaching 1 corresponds to a nearly monoclonal sample, where one clone dominates. (C) Pair-wise Scatter Plot displaying the TCR rearrangements plotted by their abundance in each sample.

**Supplemental Table 1 –TCR $\alpha$  and  $\beta$  chain use by HA-1-specific T cell clones**

|          | TCR $\alpha$ chain |                | TCR $\beta$ chain |                |                |          |
|----------|--------------------|----------------|-------------------|----------------|----------------|----------|
|          | V gene             | J gene         | V gene            | J gene         | D gene         | Constant |
| Clone 1  | TRAV17             | TRAJ28         | TRBV7-9           | TRBJ21         | TRBD1          | C2       |
| Clone 2  | TRAV21             | TRAJ40         | TRBV7-9           | TRBJ14         | TRBD1          | C1       |
| Clone 10 | TRAV10             | TRAJ45         | TRBV7-9           | TRBJ27         | TRBD2          | C2       |
| Clone 13 | As for clone 1     | As for clone 1 | As for clone 1    | As for clone 1 | As for clone 1 | C2       |
| Clone 14 | As for clone 2     | As for clone 2 | As for clone 2    | As for clone 2 | As for clone 2 | C1       |
| Clone 16 | TRAV21             | TRAJ20         | TRBV7-9           | TRBJ21         | TRBD1          | C2       |
| Clone 5  | TRAV17             | TRAJ29         | TRBV7-9           | TRBJ2          | TRBD1          | C2       |
| Clone 24 | TRAV8-3            | TRAJ27         | TRBV15            | TRBJ2-5        | TRBD1          | C2       |

**Supplemental Table 2 – Monoclonal antibodies used**

| <b>Marker</b>  | <b>Clone</b> | <b>Color</b>   | <b>Item Number</b> | <b>Manufacturer</b> |
|----------------|--------------|----------------|--------------------|---------------------|
| CD244 (2B4)    | C1.7         | FITC           | 329505             | BioLegend           |
| CCR7           | 3D12         | PE CY7         | 557648             | BD biosciences      |
| CD107a         | H4A3         | FITC           | 555800             | BD biosciences      |
| CD127          | HIL-7R-M21   | BV650          | 563225             | BD biosciences      |
| CD127          | HIL-7R-M21   | BV786          | 563324             | BD biosciences      |
| CD14           | M5E2         | BUV737         | 564444             | BD biosciences      |
| CD14           | M5E2         | PE             | 561707             | BD biosciences      |
| CD16           | 3G8          | PE CY7         | 560716             | BD biosciences      |
| CD16           | 3G8          | PE-Cy5         | 561725             | BD biosciences      |
| CD19           | HIB19        | APC            | 555415             | BD biosciences      |
| CD19           | SJ25C1       | APC-H7         | 560177             | BD biosciences      |
| CD19           | HIB19        | PE-Cy5         | 555414             | BD biosciences      |
| CD25           | 2A3          | BUV563         | 565699             | BD biosciences      |
| CD27           | L128         | BV650          | 563228             | BD biosciences      |
| CD27           | L128         | BV786          | 563328             | BD biosciences      |
| CD28           | CD28.2       | ECD            | 6607111            | Beckman Coulter     |
| CD3            | UCHT1        | BUV395         | 564001             | BD biosciences      |
| CD3            | UCHT1        | PE             | 555333             | BD biosciences      |
| CD3            | SK7          | APC-cy7        | 561800             | BD biosciences      |
| CD33           | WM53         | BB515          | 564588             | BD biosciences      |
| CD34           | QBE10        | Alexa-Fluor488 | FAB7227G           | R&D systems         |
| CD34           | QBE10        | APC            | FAB7227A           | R&D systems         |
| CD4            | SK3          | BUV805         | 564910             | BD biosciences      |
| CD4            | GK1.5        | APC-Cy7        | 552051             | BD biosciences      |
| CD4            | RPA-T4       | FITC           | 555346             | BD biosciences      |
| CD4            | SK3          | PerCP          | 340671             | BD biosciences      |
| CD45RA         | HI100        | FITC           | 555488             | BD biosciences      |
| CD45RO         | UCHL1        | BV786          | 564290             | BD biosciences      |
| CD45RO         | UCHL1        | PE-Cy7         | 560608             | BD biosciences      |
| CD56           | B159         | PE             | 555516             | BD biosciences      |
| CD57           | NK-1         | BV421          | 563896             | BD biosciences      |
| CD62L          | DREG-56      | BV605          | 562719             | BD biosciences      |
| CD8            | SK1          | APC H7         | 560179             | BD biosciences      |
| CD8            | RPA-T8       | APC            | 555369             | BD biosciences      |
| CD8            | 3B5          | Qdot 605       | Q10009             | ThermoFisher        |
| CD8            | HIT8a        | PE             | 555635             | BD biosciences      |
| CD8            | RTF-8        | PE-Texas Red   | ab51388            | Abcam               |
| CD8            | RPA-T8       | Pacific Blue   | 558207             | BD                  |
| CD8            | SK1          | PerCP          | 347314             | BD biosciences      |
| CD8-β          | SID18BEE     | PE-Cy7         | 25-5273-42         | Ebioscience         |
| Foxp3          | PCH101       | APC            | 17-4777-42         | Ebioscience         |
| HA-1 Dextramer | NA           | PE             | WB2622             | IMMUDEx             |
| HA-1 Dextramer | NA           | APC            | WB2622             | IMMUDEx             |
| IFNγ           | 25723.11     | FITC           | 340449             | BD biosciences      |
| IL2 PE         | MQ1-17H12    | PE             | 340450             | BD biosciences      |
| Lag-3 (CD233)  | 11C3C65      | PE-Cy7         | 369309             | BioLegend           |
| Live/Dead      | NA           | FVS 510        | 564406             | BD biosciences      |
| Live/Dead      | NA           | FVS700         | 564997             | BD biosciences      |
| Live/Dead      | NA           | DAPI           | D8417              | Sigma               |
| PD1            | MIH4         | BV395          | 745619             | BD biosciences      |
| PD1            | EH12.1       | BV421          | 562516             | BD biosciences      |
| TIM3 (CD366)   | 7D3          | PE             | 563422             | BD biosciences      |
| TNF-alpha      | MAb11        | PE-Cy7         | 25-7349-41         | Ebioscience         |

Supplemental Figure 1. Isolation of high functional avidity HA-1-specific T cell clones.

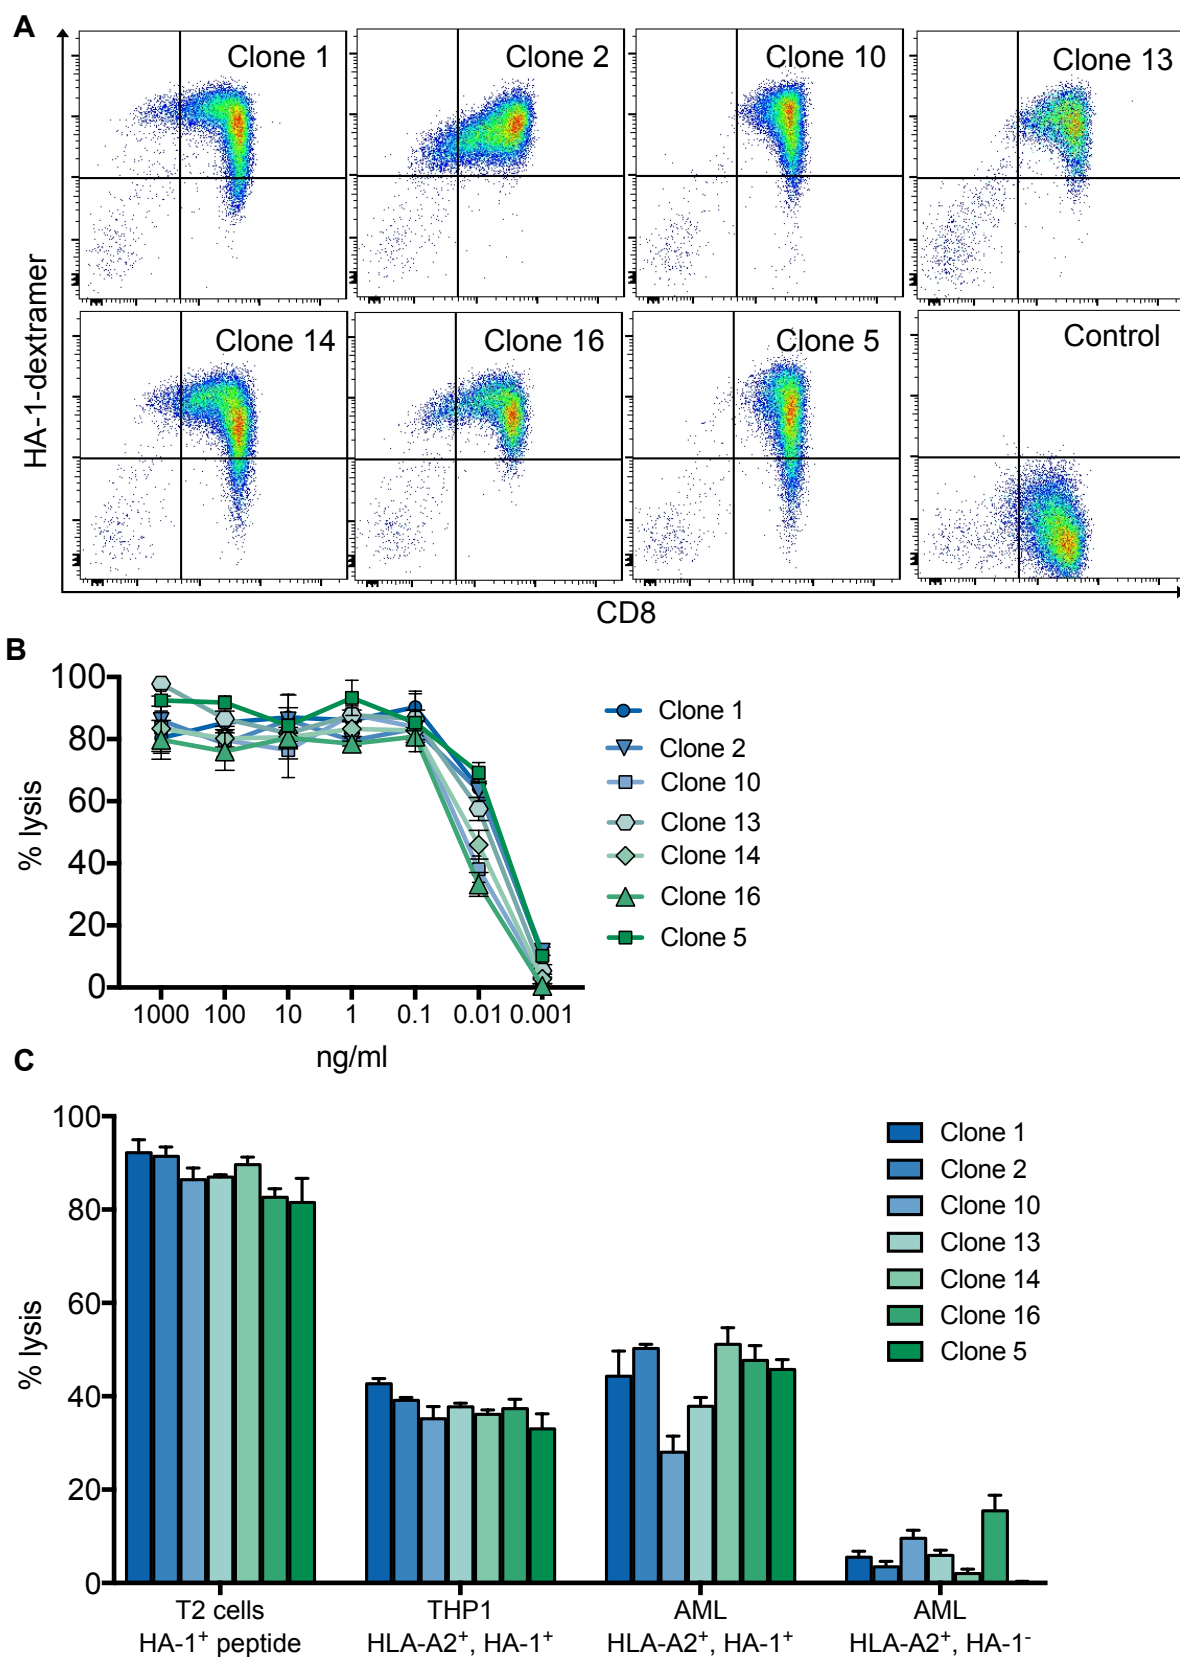

Supplemental Figure 2. HLA-A2 expression on leukemia cell lines transduced with LV encoding HLA-A2.

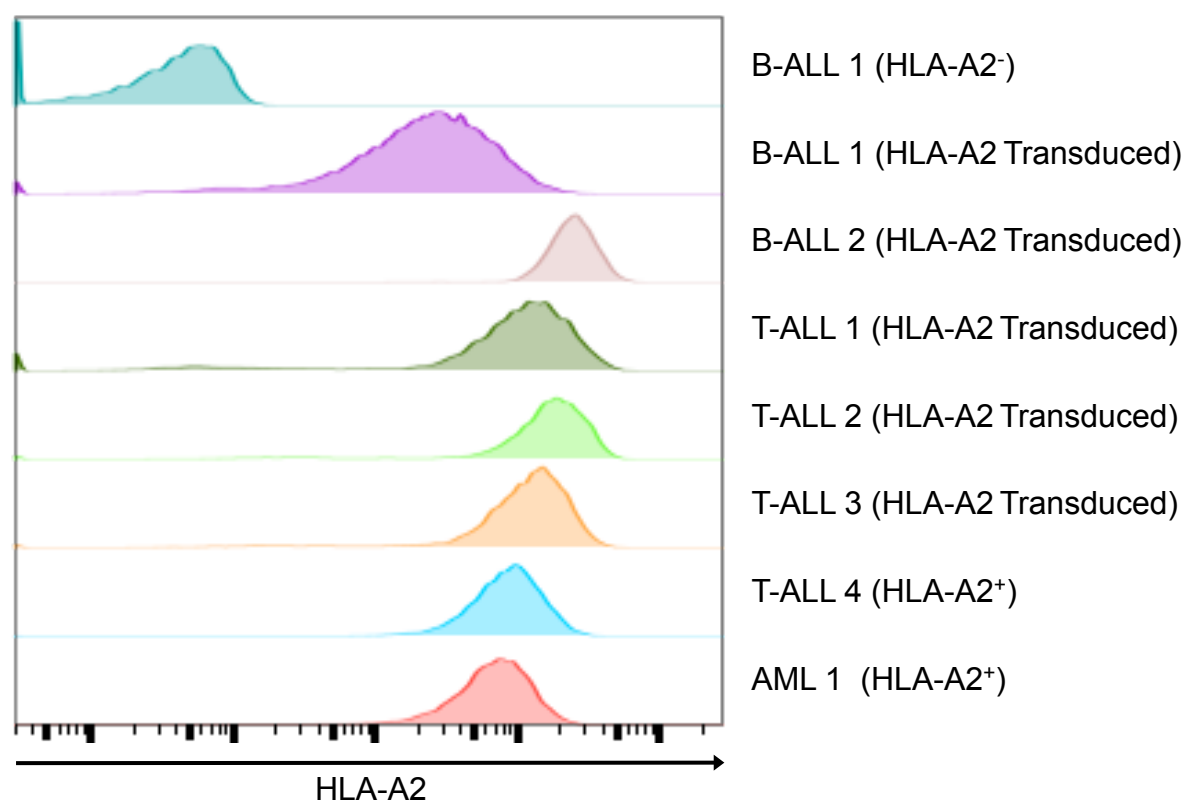

Supplemental Figure 3. Evaluation of CD4<sup>+</sup> T cells transduced with the HA-1 TCR2 and CD8 co-receptor variants

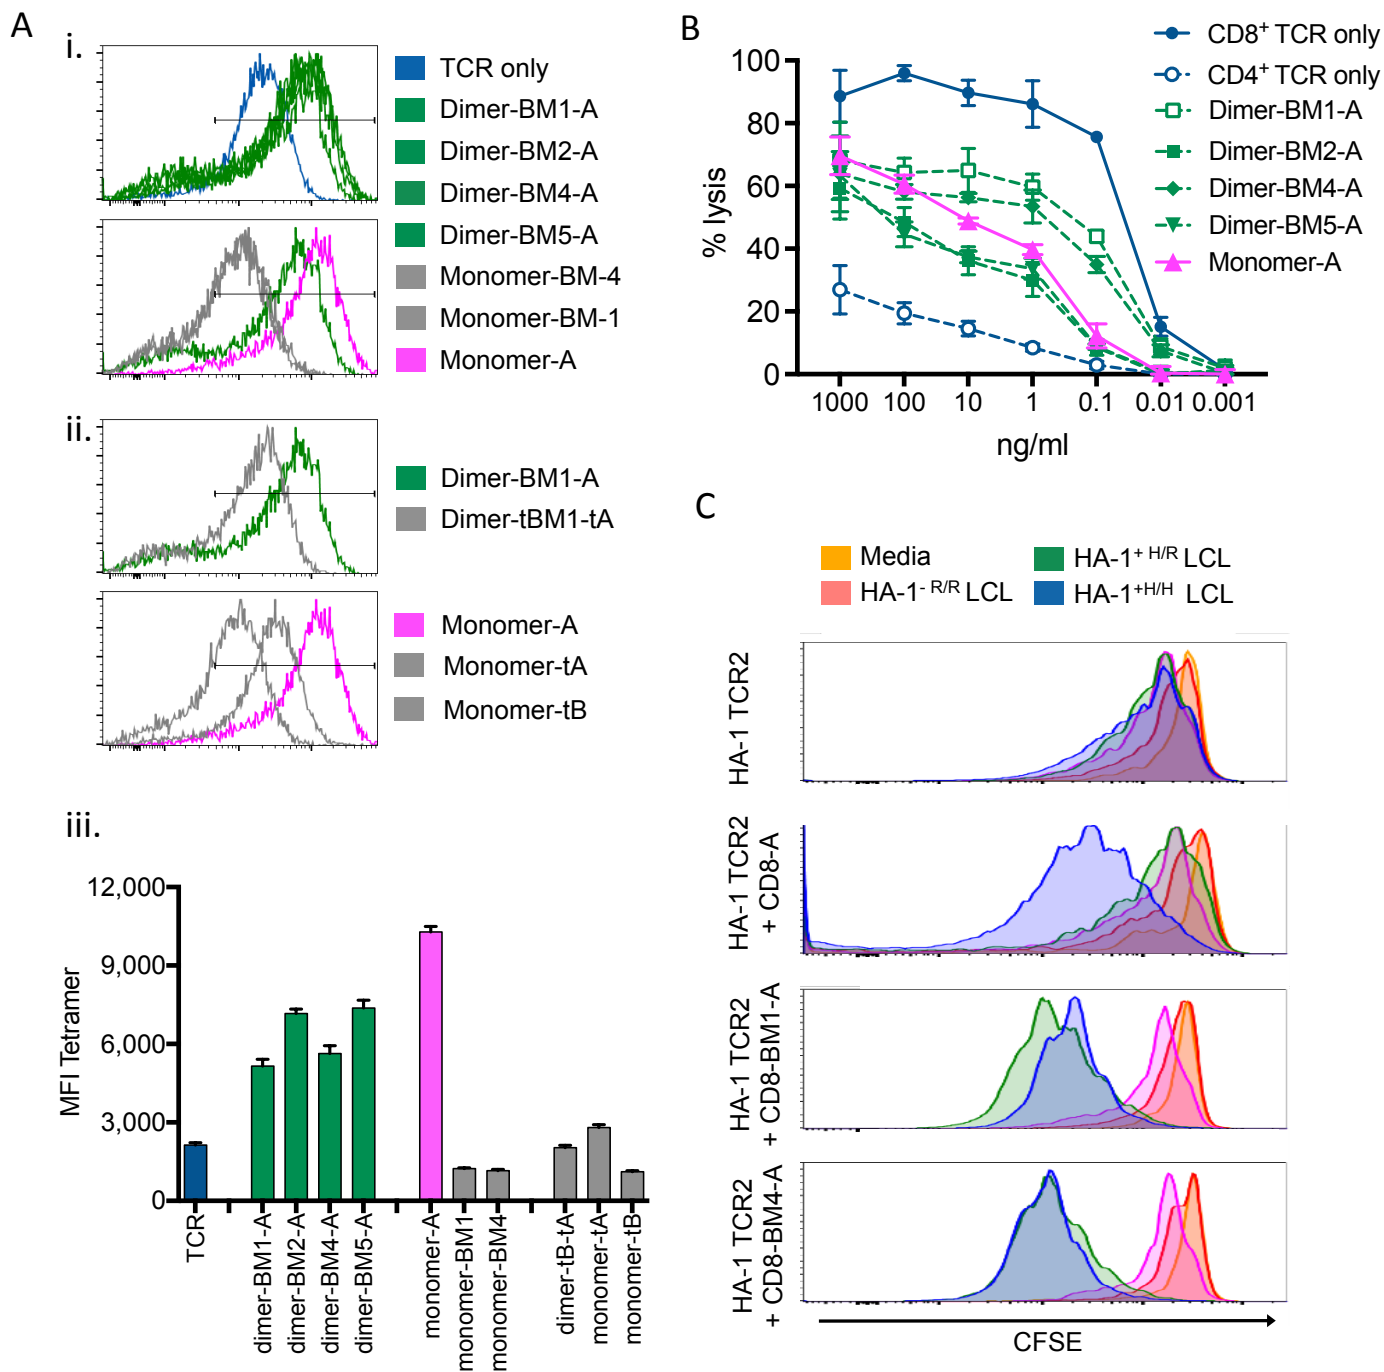

Supplemental Figure 4. CD8<sup>+</sup> and CD4<sup>+</sup> T cells transduced with the HA-1 TCR2 and CD8 co-receptor co-culture evaluation.

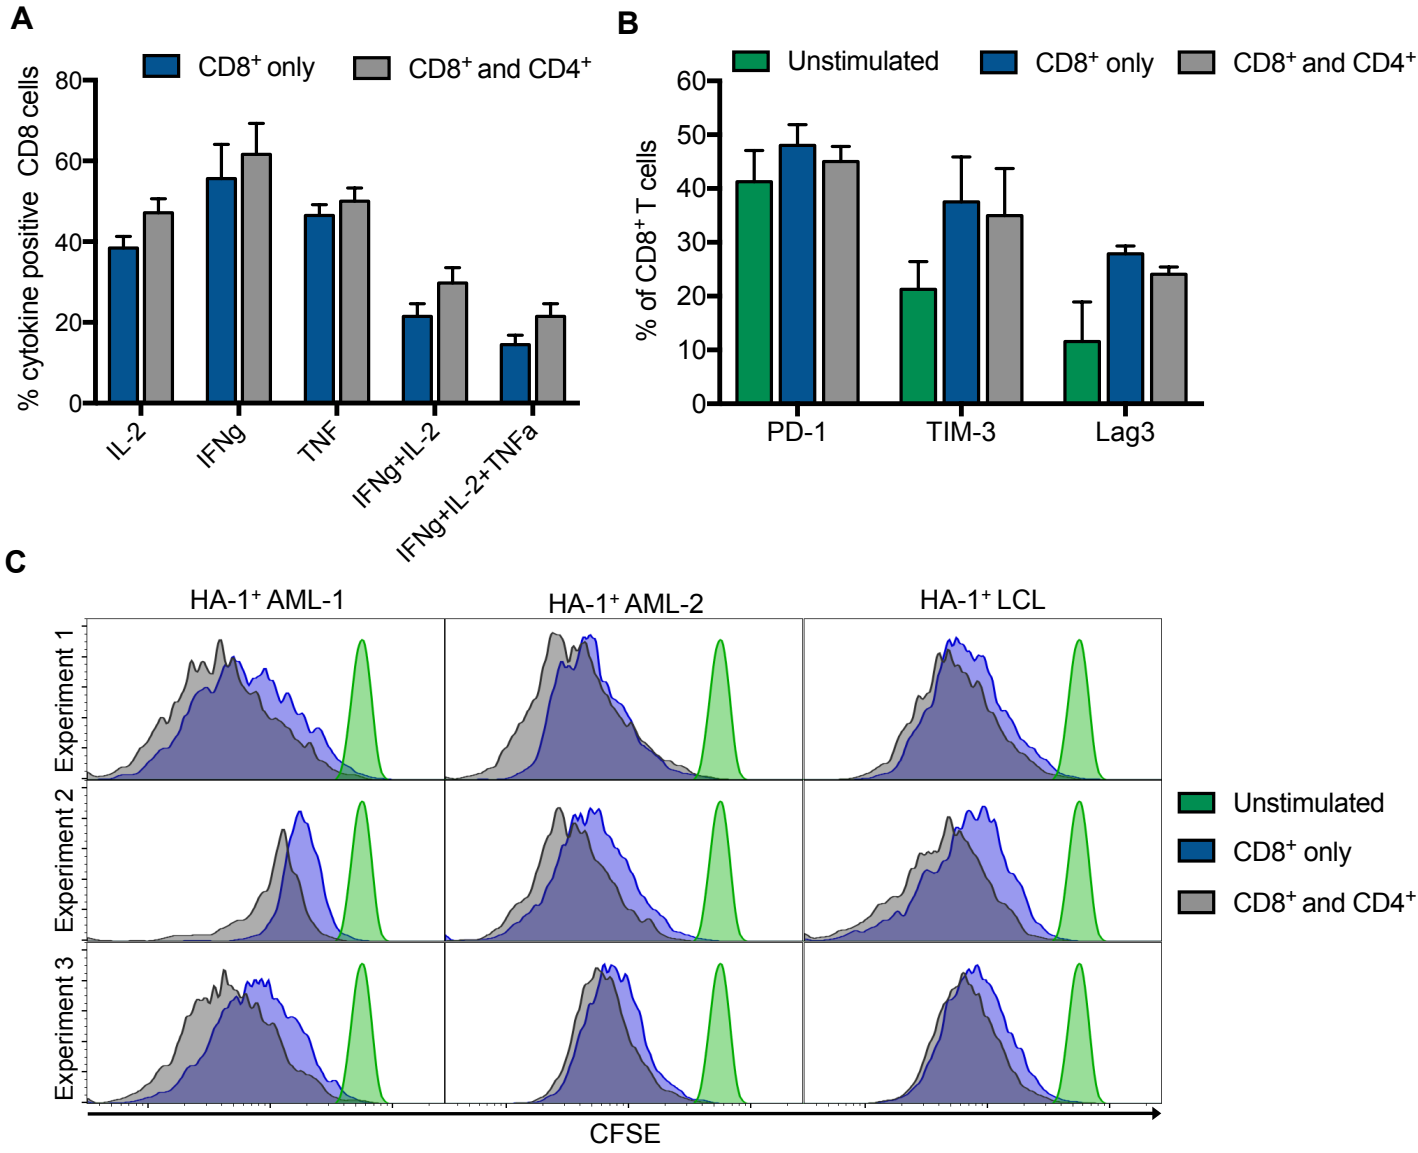

Supplemental Figure 5. Susceptibility of safety switch genes to safety switch activating drugs

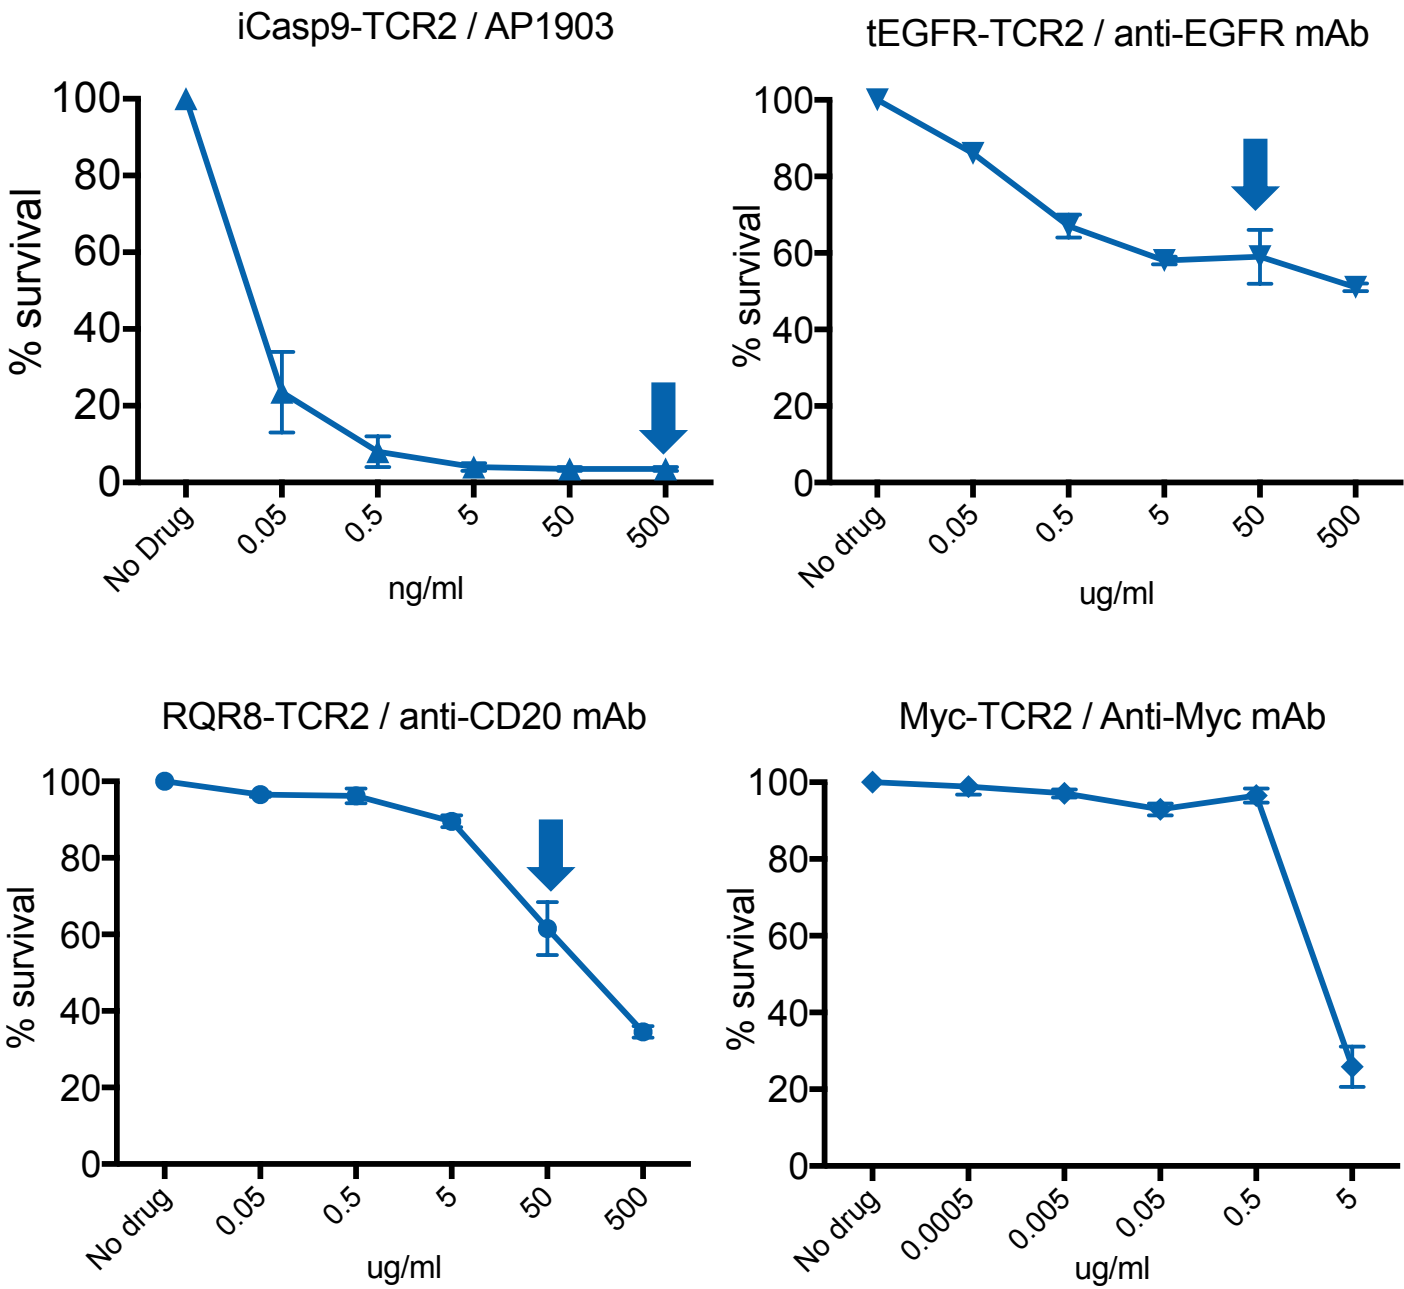

Supplemental Figure 6. Evaluation of HA-1 TCR and CD34 epitope expression on transduced T cells over time

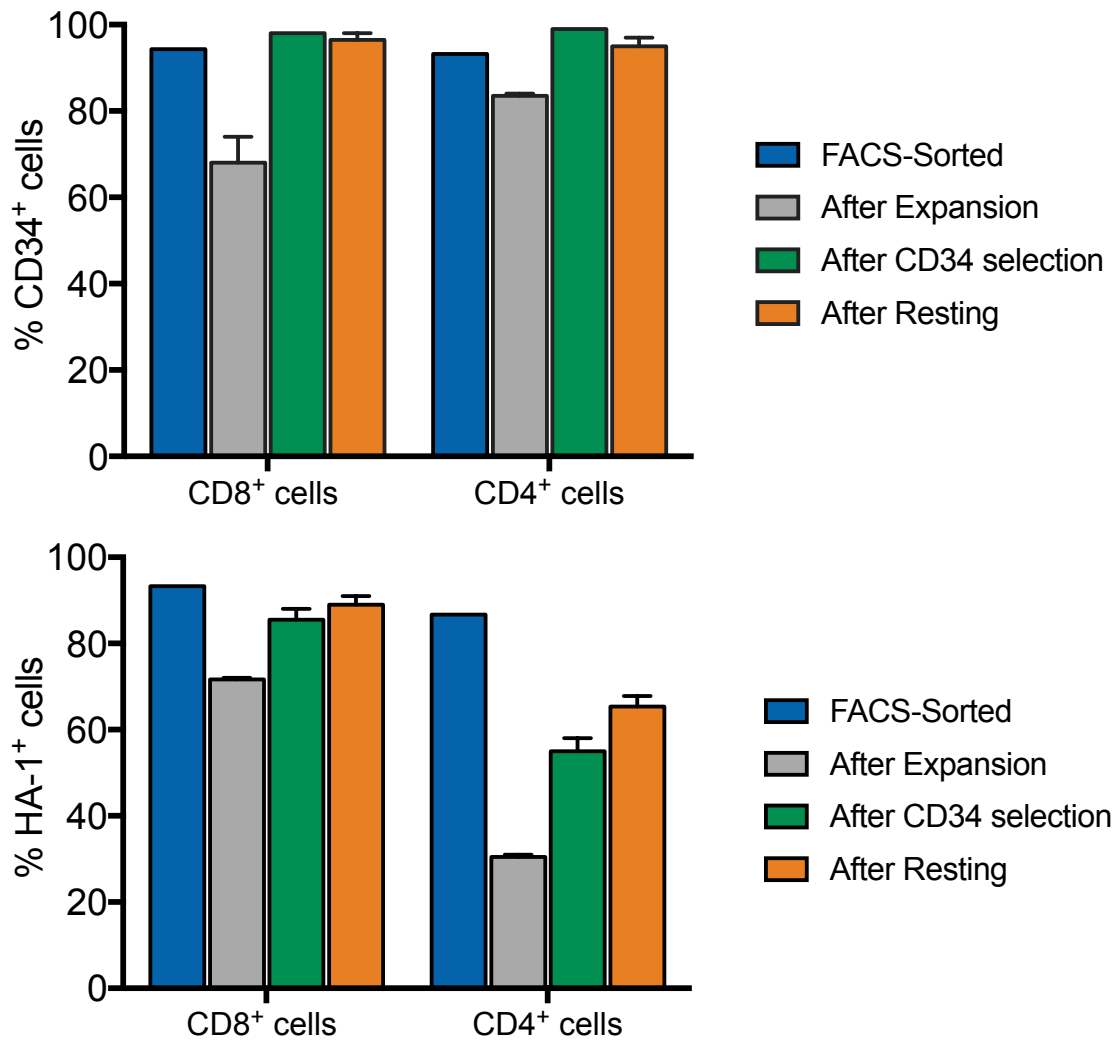

Supplemental Figure 7. Evaluation of clinical-scale HA-1-TCR2-RQR-CD8 transduced T cells selection tag and safety-switch efficacy.

**A**

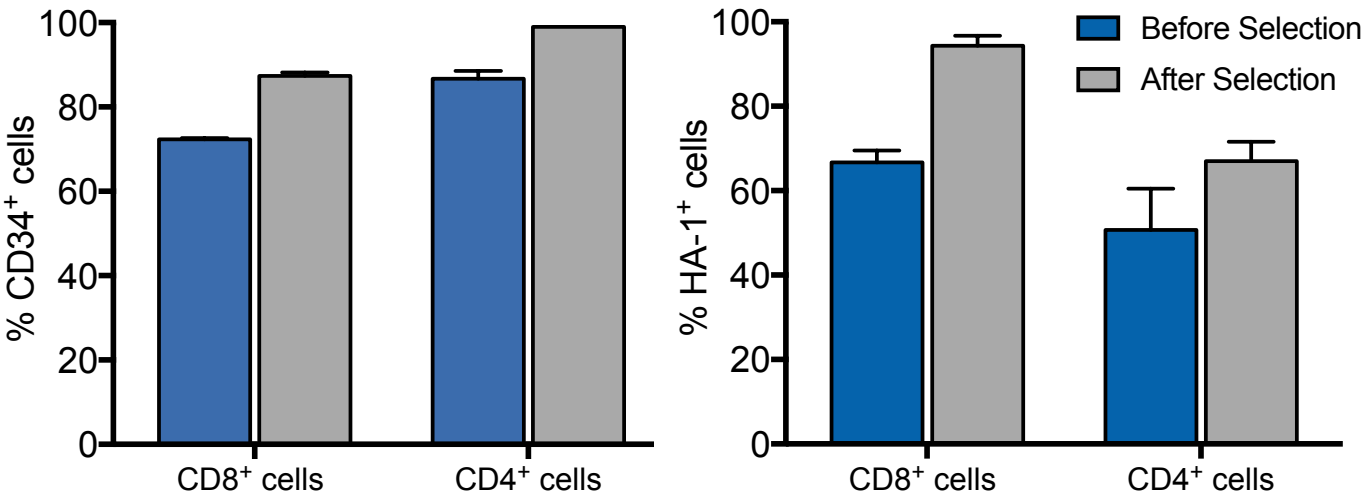

**B**

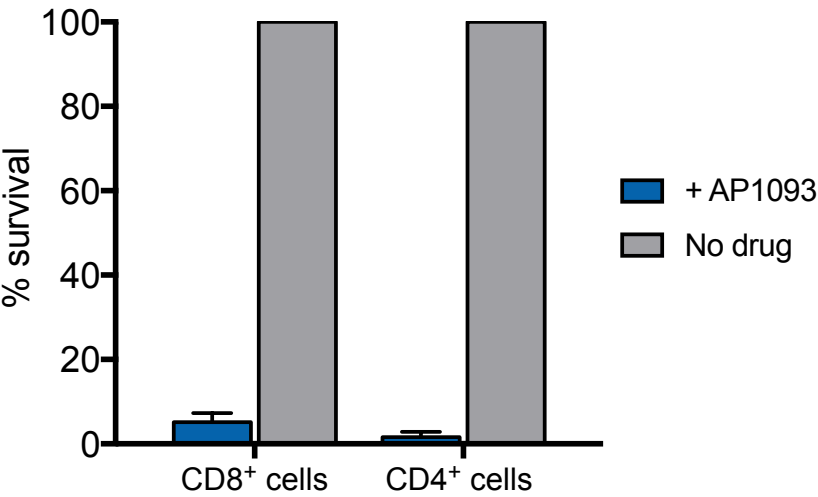

Supplemental Figure 8. Evaluation of native TCR beta repertoire.

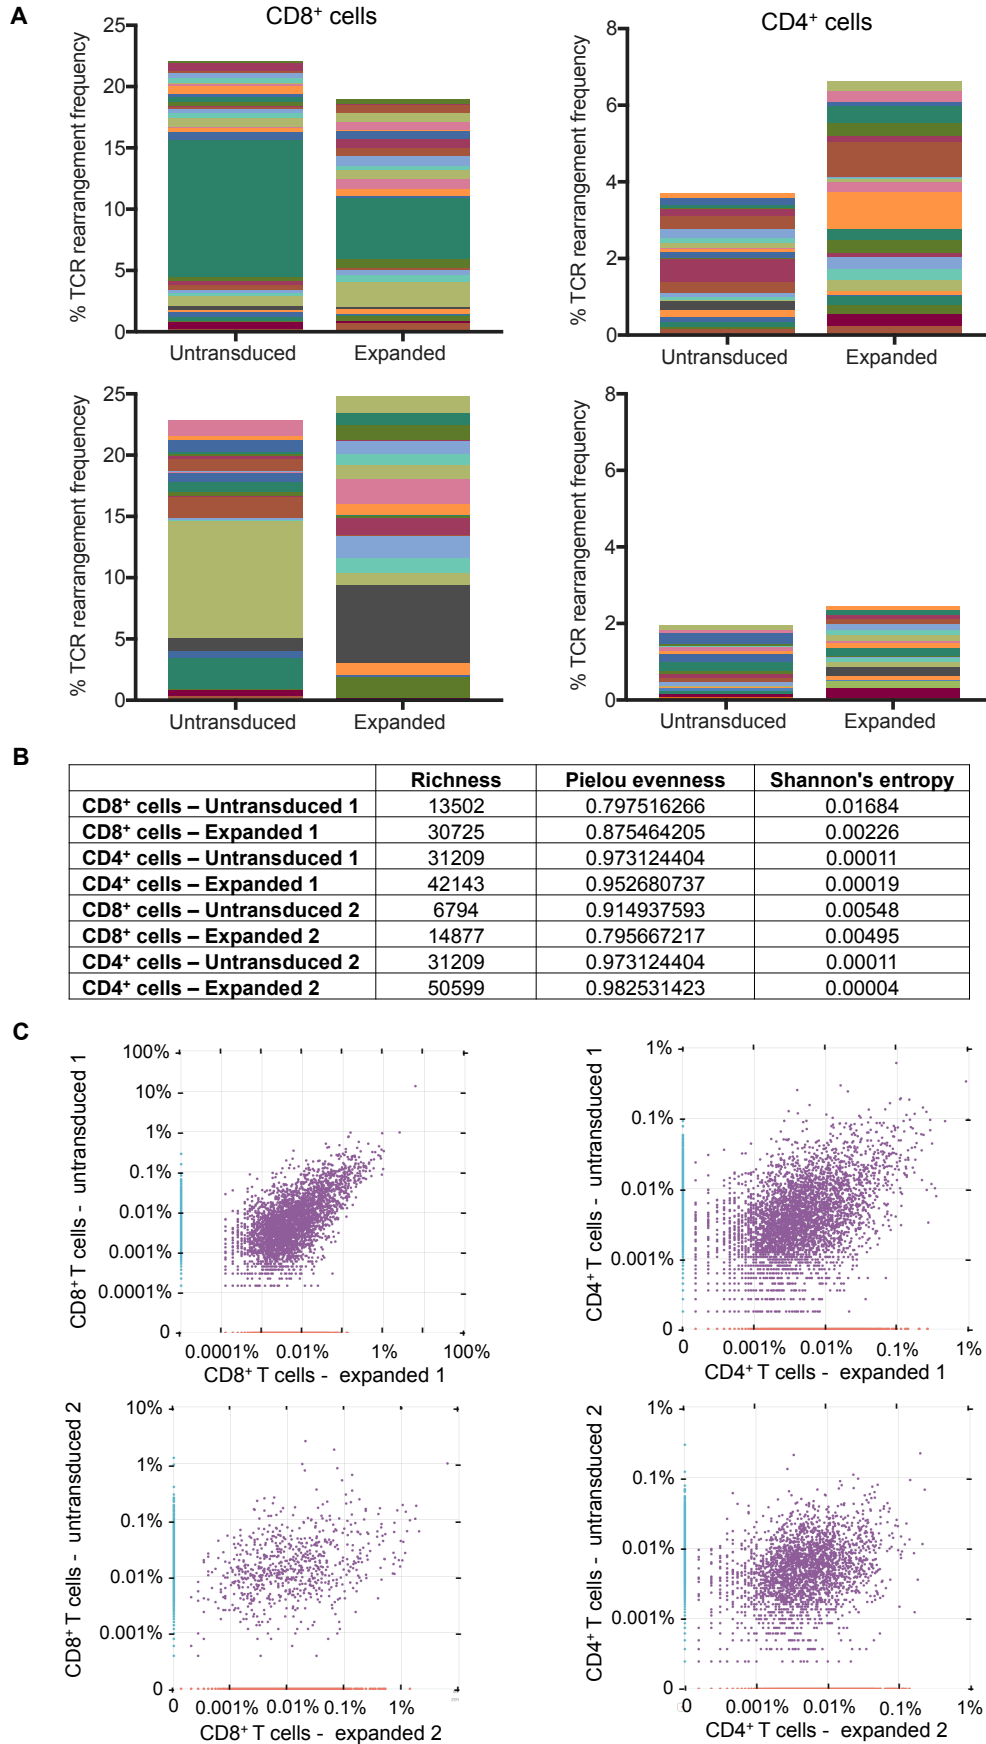

Supplement: blood791608-suppl1.pdf [file blood791608-suppl1.pdf]
